# Supplementary material for: Delta Radiomics Model Predicts Lesion-Level Responses to Tyrosine Kinase Inhibitors in Patients with Advanced Renal Cell Carcinoma: A Preliminary Result
Source: MDPI journal article supplement (doi:10.3390/jcm12041301), 2023-02-06
Supplement: s1 [file s1]

The tree structure of NC model:

$x[0]$ = CT\_original\_glcm\_ClusterShade

$x[1]$ = CT\_original\_glcm\_ClusterTendency

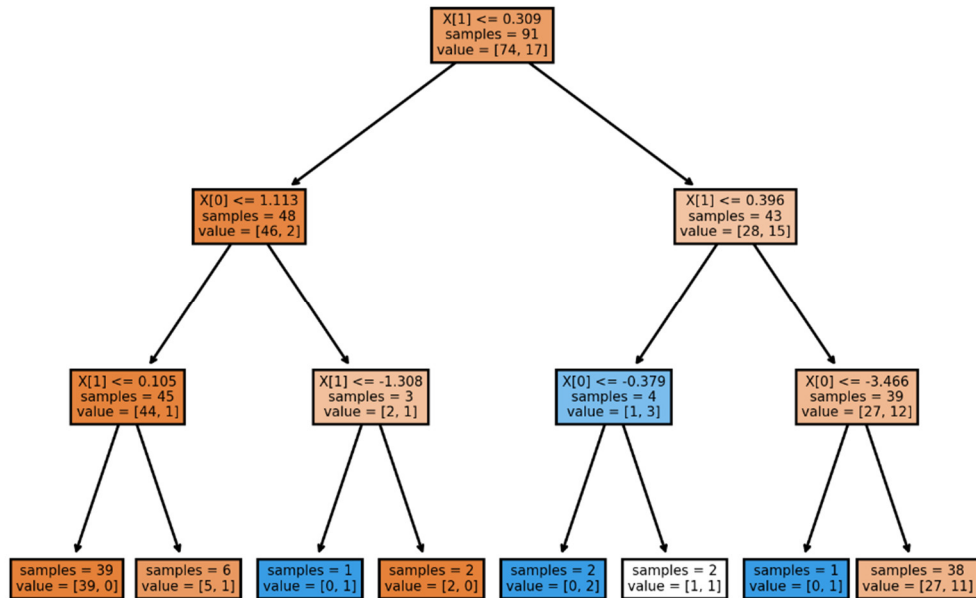

Figure S1. The tree structure of NC model.

The tree structure of AP model:

$x[0]$ = CT\_original\_firstorder\_90Percentile

$x[3]$ = CT\_original\_gldm\_ClusterShade

$x[4]$ = CT\_original\_gldm\_SmallDependenceLowGrayLevelEmphasis

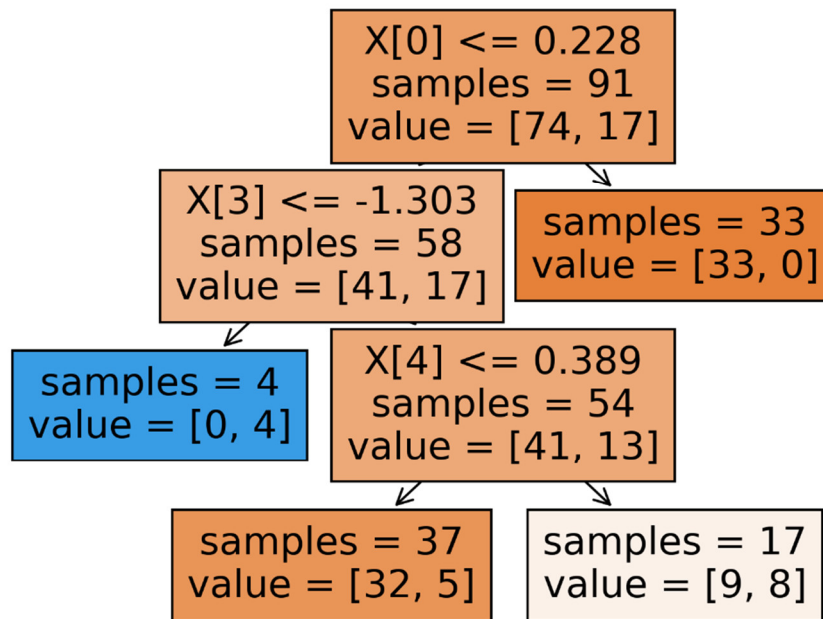

Figure S2. The tree structure of AP model.

The tree structure of NC+AP model:

x[0]= NCCT\_original\_glcml\_ClusterShade

x[1]= NCCT\_original\_glcml\_ClusterTendency

x[2]= APCT\_original\_firstorder\_90Percentile

x[3]= APCT\_original\_firstorder\_Maximum

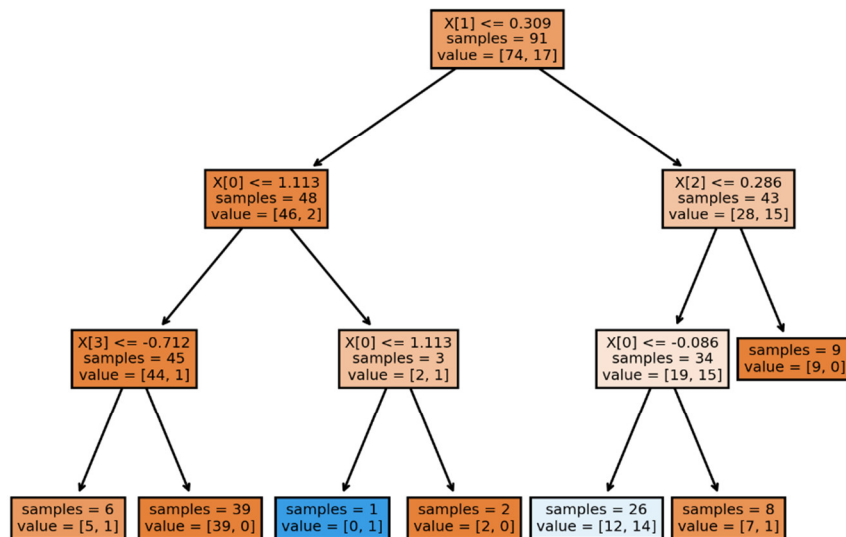

Figure S3. The tree structure of NC + AP model.

The tree structure of delta model:

x[0]= CT\_original\_firstorder\_90Percentile

x[2]= CT\_original\_firstorder\_Maximum

x[3]= CT\_original\_firstorder\_Range

x[4]= CT\_original\_firstorder\_Uniformity

x[5]= CT\_original\_glszm\_ZoneEntropy

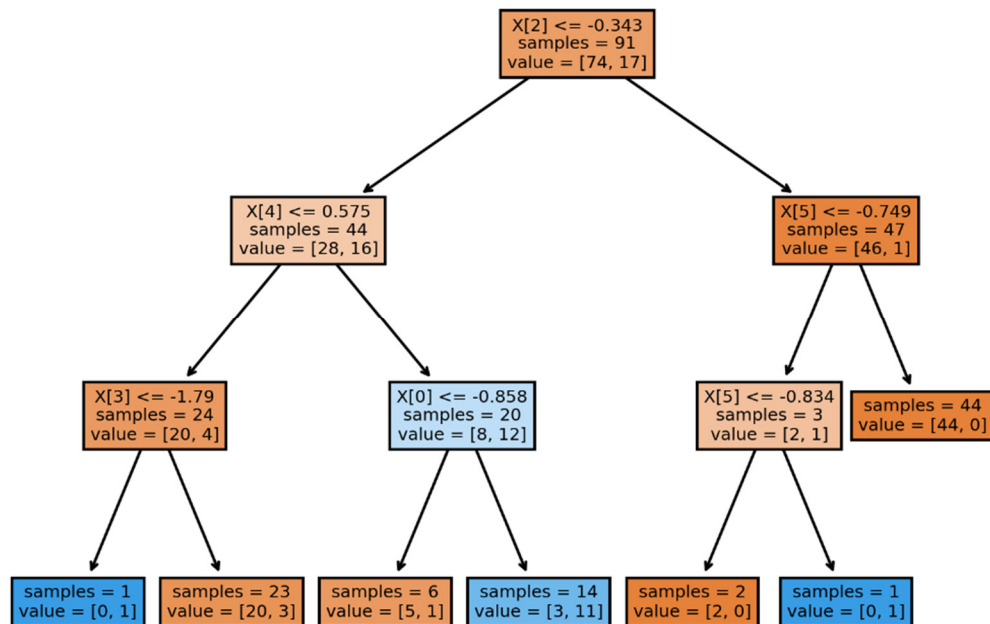

Figure S4. The tree structure of delta model.
